# Supplementary material for: Evolution of microstructure and related optical properties of ZnO grown by atomic layer deposition
Source: PubMed Central journal article supplement (PMC3817613; doi:10.3762/bjnano.4.78), 2013-10-28
Supplement: Beilstein_J_Nanotechnol-04-690-s001.pdf [file Beilstein_J_Nanotechnol-04-690-s001.pdf]

# Supporting Information

for

## Evolution of microstructure and related optical properties of ZnO grown by atomic layer deposition

Adib Abou Chaaya<sup>‡1</sup>, Roman Viter<sup>‡2,3\*</sup>, Mikhael Bechelany<sup>§1\*</sup>, Zanda Alute<sup>2</sup>, Donats Erts<sup>4</sup>, Anastasiya Zaleskaya<sup>2</sup>, Kristaps Kovalevskis<sup>3</sup>, Vincent Rouessac,<sup>1</sup> Valentyn Smyntyna<sup>2</sup> and Philippe Miele<sup>1</sup>

Address: <sup>1</sup>European institute of membranes (IEM, ENSCM-UM2-CNRS, UMR 5635), University of Montpellier 2, Place Eugène Bataillon, F-34095, Montpellier, France, <sup>2</sup>Faculty of Physics, Odessa National I.I. Mechnikov University, 42, Pastera, 65026, Odessa, Ukraine, <sup>3</sup>Institute of Atomic Physics and Spectroscopy & Institute of Chemical Physics, University of Latvia, 19, Raina Blvd., LV 1586, Riga, Latvia, and <sup>4</sup>Institute of Chemical Physics, University of Latvia, 19, Raina Blvd., LV 1586, Riga, Latvia

Email: Mikhael Bechelany\* - mikhael.bechelany@univ-montp2.fr, Roman Viter\* - viter\_r@mail.ru

\* Corresponding author

§Phone. +33 4 67 14 91 67, Fax. +33 4 67 14 91 19

‡These authors contributed equally to the paper

## Additional figures

## SEM of ZnO ALD films

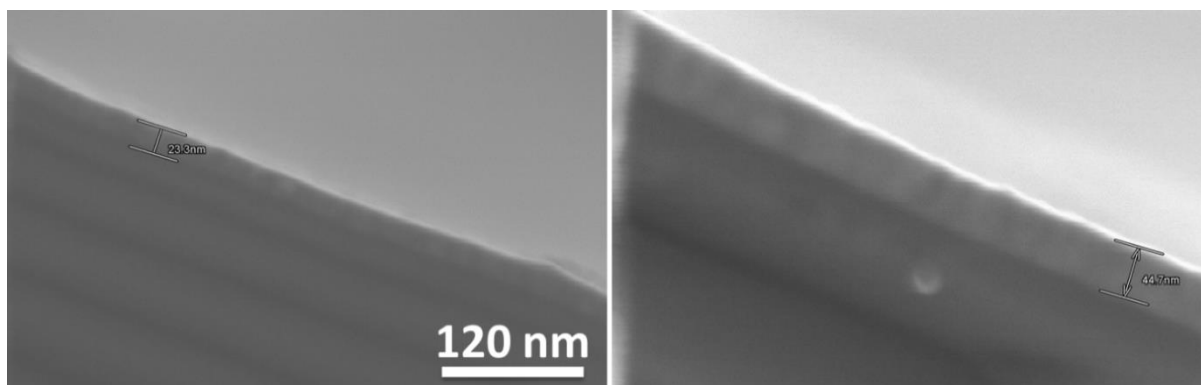

**Figure S1:** SEM images of the cross section of ZnO ALD films deposited on Si substrates by 100 and 200 cycles.

## FTIR spectra of ZnO ALD films of different thickness

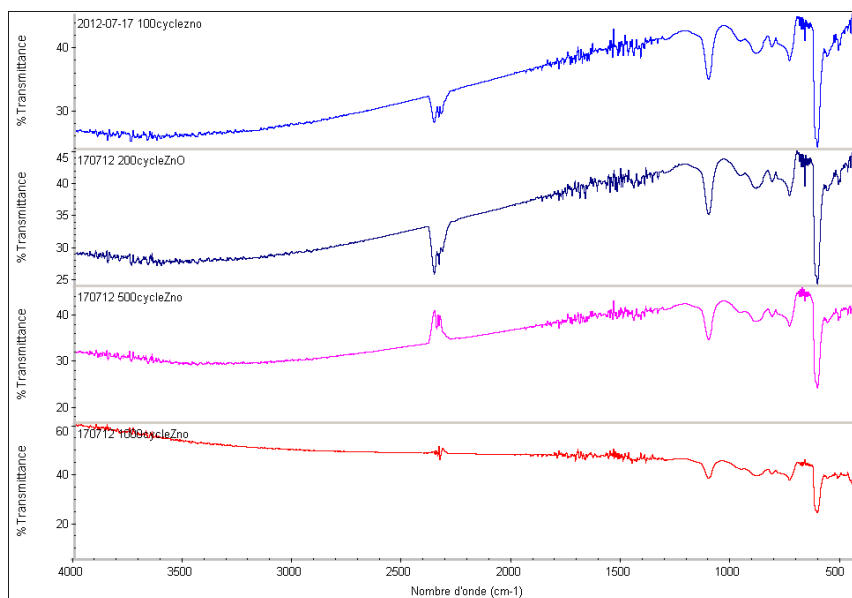

**Figure S2:** FTIR spectra of ZnO thin films deposited within 100, 200, 500, and 1000 cycles.

## TEM measurement of 250 nm ZnO ALD films

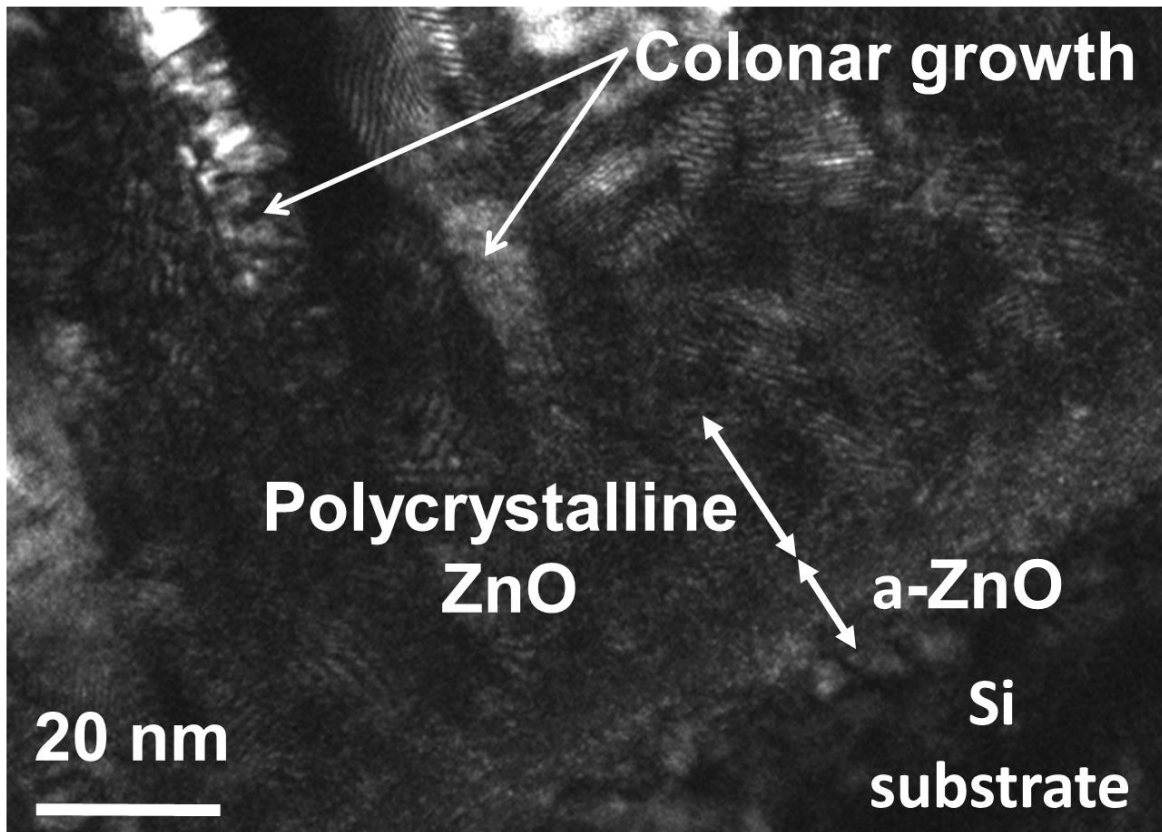

**Figure S3:** Cross section TEM image of a 1000 cycles ZnO ALD film deposited on Si substrate.

## PL measurement of ZnO ALD films of different thicknesses

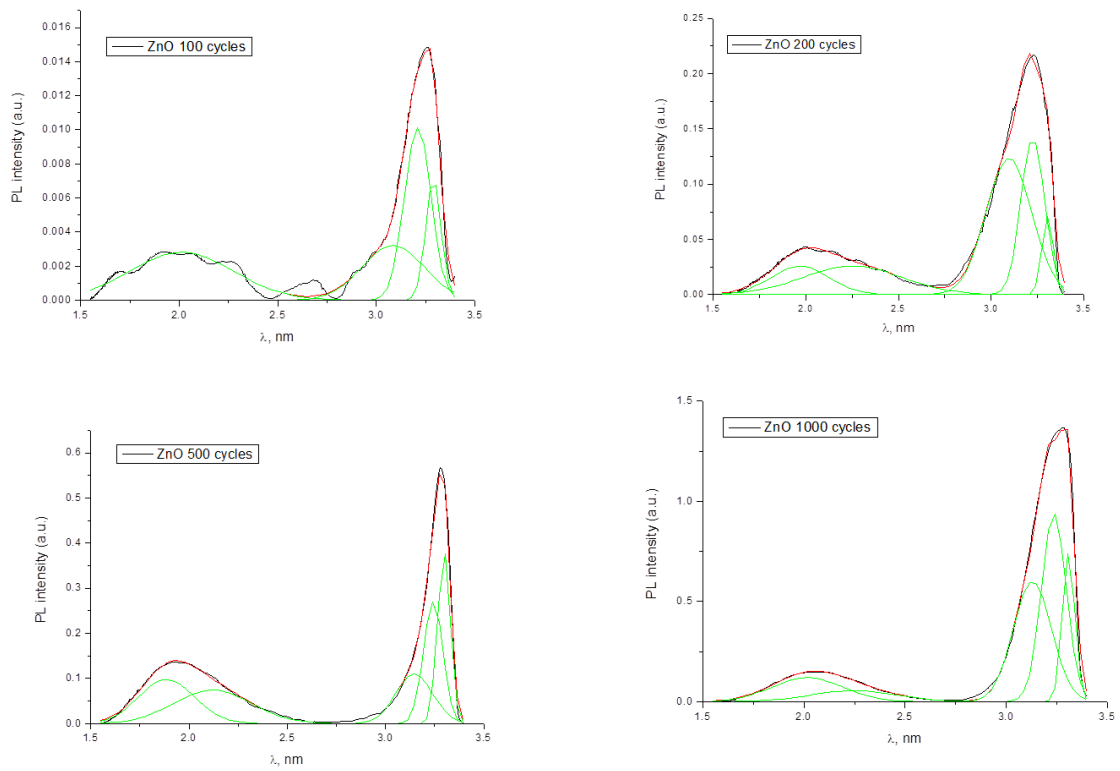

**Figure S4:** Gaussian fit of PL spectra of 25, 49.8, 124, and 250 nm thick ZnO ALD films.
